# Supplementary material for: SARS-CoV-2 induces robust germinal center CD4 T follicular helper cell responses in rhesus macaques
Source: PubMed Central journal article supplement (PMC7822826; doi:10.1038/s41467-020-20642-x), 2021-01-22
Supplement: 41467_2020_20642_MOESM1_ESM.pdf [file 41467_2020_20642_MOESM1_ESM.pdf]

## SUPPLEMENTARY FIGURE TITLES AND LEGENDS

**Supplementary Table 1. Antibody and chemical information.** All antibodies and chemicals used in the study are denoted.

**Supplementary Table 2. Animal information.** Sex, Age, Body weight, treatment, infusion volume, blood donor type, total volume infused, necropsy date, prior treatments and extra notes for all animals on the study.

**Supplementary Table 3a. Spleen AIM Assay conditions.** N, S, M, ORF (nsp3, nsp4, 3a, 8), or P/I stimulation conditions for each animal on the study.

**Supplementary Table 3b. Mediastinal LN AIM Assay conditions.** N or S peptide stimulation conditions for mediastinal LN for each animal on the study.

### 1. Supplementary Table 1 ANTIBODIES

| Reagents           | Clone    | Source            | Catalog number | Lot Number | Concentration for staining |
|--------------------|----------|-------------------|----------------|------------|----------------------------|
| CD3-AF 700         | SP34-2   | BD<br>Biosciences | 557917         | 9277122    | 0.2 mg/ml                  |
| CD3-APC-Cy7        | SP34-2   | BD<br>Biosciences | 557757         | 9252411    | 0.2 mg/ml                  |
| CD4-BV 650         | L200     | BD<br>Biosciences | 563737         | 9036946    | 0.25 mg/ml                 |
| CD8-BV 510         | SK-1     | BD<br>Biosciences | 563919         | 9344072    | 0.2 mg/ml                  |
| CD8-BUV 805        | SK-1     | BD<br>Biosciences | 564913         | 0195677    | 0.2 mg/ml                  |
| CD20-APC-Cy7       | 2H7      | BioLegend         | 302314         | B288789    | 0.2 mg/ml                  |
| CD20-BV 421        | 2H7      | BioLegend         | 302328         | B285815    | 0.1 mg/ml                  |
| CD95-BUV 737       | DX2      | BD<br>Biosciences | 564710         | 0192242    | 0.2 mg/ml                  |
| CD279(PD-1)-Pe-Cy7 | EH12.2H8 | BioLegend         | 329918         | B272021    | 0.2 mg/ml                  |
| CX3CR1-PE-CF594    | 2A9-1    | BioLegend         | 341624         | B295187    | 0.1 mg/ml                  |
| CXCR3-BV 786       | IC6      | BD<br>Biosciences | 741005         | 0078361    | 0.05 mg/ml                 |
| CXCR5-PE           | MU5UBEE  | Thermofischer     | 12-9185-411G1  | 2119063    | 0.125 mg/ml                |
| CCR4-BV 605        | 1G1      | BD<br>Biosciences | 562906         | 9290304    | 0.24 mg/ml                 |
| CCR6-PE-CF594/A610 | G034E3   | BioLegend         | 353430         | B298181    | 0.05 mg/ml                 |
| CCR7-BV 650        | 3D12     | BD<br>Biosciences | 563407         | 0078602    | 0.2 mg/ml                  |
| HLA-DR-BV 786      | L243     | BioLegend         | 307642         | B283993    | 0.1 mg/ml                  |

|                           |           |                    |              |                    |               |
|---------------------------|-----------|--------------------|--------------|--------------------|---------------|
| CD69-BV<br>711            | FN50      | BioLegend          | 310944       | B277989            | 0.1 mg/ml     |
| CD69-Pe-<br>Cy7           | FN50      | Invitrogen         | 25-0699-42   | 2165779            | 0.06 mg/ml    |
| CD14-AF<br>700            | MSE2      | BD<br>Biosciences  | 301822       | B285400            | 0.5 mg/ml     |
| CD16-BV<br>605            | 3G8       | BD<br>Biosciences  | 563172       | 9179026            | 0.12 mg/ml    |
| CD11b-BV<br>510           | ICRF44    | Thermofisher       | 563088       | B244424            | 0.2 mg/ml     |
| CD11c-Pe-<br>Cy7          | 3.9       | Invitrogen         | 25-0116-42   | 2142959            | 0.2 mg/ml     |
| CD103-APC                 | 2G5       | Beckman<br>Coulter | B06204       | 200042             | 0.1 mg/ml     |
| CD66-APC                  | TET2      | Miltenyi           | 130-118-539  | 520030076<br>5     | 1:50 dilution |
| CD163-PE                  | GHI/61    | BioLegend          | 333606       | B289302            | 0.2 mg/ml     |
| CD123-BV<br>421           | 7G3       | Thermofisher       | 501129764    | 2181846            | 0.2 mg/ml     |
| Granzyme<br>B-BV 421      | GB11      | BioLegend          | 515408       | B301155            | 0.1 mg/ml     |
| CD80-AF<br>488            | 2D10.4    | Invitrogen         | 11-0809-42   | 2144183            | 0.2 mg/ml     |
| CD86-AF<br>488            | IT2.2     | BioLegend          | 305414       | B243405            | 0.4 mg/ml     |
| Ki-67-AF<br>488           | B56       | BD<br>Biosciences  | 558616       | 9123835            | 0.05 mg/ml    |
| Ki-67-BV<br>510           | B56       | BD<br>Biosciences  | 563462       | 9301839            | 0.4 mg/ml     |
| CD28-Pe-<br>Cy7           | CD28.2    | Tonbo              | 40-0289-U500 | B259245            | 0.05 mg/ml    |
| a4b7-PE                   | Act-1     | NHP Reag<br>Res    | PR-1422      | EP021219           | 0.2 mg/ml     |
| CD45-AF<br>488            | D058-1283 | BD<br>Biosciences  | 557803       | 9311681            | 0.025 mg/ml   |
| CD45-BV<br>605            | D058-1283 | BD<br>Biosciences  | 564098       | 9051992            | 0.2 mg/ml     |
| CD140b-<br>APC            | 18A2      | BioLegend          | 323608       | B285844            | 0.3 mg/ml     |
| Bcl-6-APC-<br>Cy7         | K112-91   | BD<br>Biosciences  | 563581       | 0050675            | 0.1 mg/ml     |
| CD21- PE-<br>CF594        | B-ly4     | BD<br>Biosciences  | 563474       | 0066046            | 0.1 mg/ml     |
| SLAM-AF<br>488            | A12(7D4)  | BioLegend          | 306312       | B268886            | 0.4 mg/ml     |
| Foxp3-APC                 | 206D      | BioLegend          | 320114       | B241845            | 0.03 mg/ml    |
| CD278<br>(ICOS)-BV<br>785 | C396.4A   | BioLegend          | 313534       | 305759             | 0.15 mg/ml    |
| CD25-APC                  | BC96      | Tonbo              | 20-0259-T100 | C0259082<br>118203 | 0.25 mg/ml    |

|                      |             |                   |            |              |             |
|----------------------|-------------|-------------------|------------|--------------|-------------|
| CD 134 (OX40)-BV 786 | L106        | BD Biosciences    | 744746     | 0170918      | 0.1 mg/ml   |
| 4-1BB-AF 488         | 4B4-1       | BD Biosciences    | 11-1379-42 | 281868       | 0.2 mg/ml   |
| TNFa-AF 488          | Mab11       | BioLegend         | 502906     | B271495      | 0.1 mg/ml   |
| IL-21-APC            | 3A3-N2.1    | BD Biosciences    | 560493     | 9199272      | 0.025 mg/ml |
| IFNG-PeCy7           | B27         | BioLegend         | 506518     | B255741      | 0.1 mg/ml   |
| IL2- PE-CF594        | MO1-17H12   | BioLegend         | 500344     | B245312      | 0.025 mg/ml |
| CD107a-PE            | H4A3        | BioLegend         | 328608     | B283846      | 0.4 mg/ml   |
| CD107b-PE            | EbioH4B4    | Thermofischer     | 12-1078-42 |              | 0.1 mg/ml   |
| IL-17-BV 421         | eBio64DEC17 | eBiosciences      | 48-7179-42 | 2181862      | 0.2 mg/ml   |
| CD45 RO-PE-CF594     | UCHL-1      | BD Biosciences    | 562299     | 9078806      | 0.2 mg/ml   |
| CD28- Purified Ab    | CD28.2      | BD Biosciences    | 555725     | 9266655      | 0.5 mg/ml   |
| CD49d- Purified Ab   | 9F10        | BD Biosciences    | 555501     | 9154508      | 0.5 mg/ml   |
| Live/dead-APC-Cy7    |             | Life technologies | L34976     | 2192281      | 1:100       |
| Live/dead-BV 510     |             | Life technologies | L34966     | 1899019      | 1:100       |
| Bcl-6                | LN22        | Biocare Medical   | CM410A     | 080420A      | 1:100       |
| CD3                  | CD3-12      | Abcam             | Ab11089    | GR336112 5-1 | 1:100       |
| PD-1                 | Polyclonal  | Novus             | NBP1-88104 | 000000440    | 1:100       |

## 2. Chemicals:

| Reagents                             | Source                             | Identifier (Cat#) | Lot Number | Concentrations                                    |
|--------------------------------------|------------------------------------|-------------------|------------|---------------------------------------------------|
| Golgi Stop                           | BD Biosciences                     | 554724            | 9213627-A  | 3 mM                                              |
| Golgi Plug                           | BD Biosciences                     | 555029            | 9284211    | 1mg/ml                                            |
| PMA+ Ionomycin cocktail mix          | eBiosciences                       | 00-4970-93        | 2157128    | 500X                                              |
| T cell activation/ expansion kit NHP | MACS Miltenyi Biotech              | 130-092-919       | 519083-132 | 10 ug/antibody/ml<br>5ul/ test/ one million cells |
| AIM V media                          | Gibco                              | 12055091          | 2166131    |                                                   |
| RPMI media-1640                      | Gibco                              | 11875098          | 2183709    |                                                   |
| Cytofix/cytoperm                     | BD Biosciences                     | 51-2090K2         | 6292704    | 100 ul/test                                       |
| DNAse-I                              | Roche diagnostics                  | BM070             | 00876819   | 30 U/ml                                           |
| Collagenase-type IV                  | Worthington Biomedical corporation | LS004188          | 49A19027   | 250 U/ml                                          |

**Supplementary Table 2. Animal Information**

| Animal code | Sex | Age     | Body Weight (kg) | Treatment      | Infusion Volume | Total volume infused (4ml/kg) | Nx Day | Prior treatments                                                                                                                     | Clinical Notes       |
|-------------|-----|---------|------------------|----------------|-----------------|-------------------------------|--------|--------------------------------------------------------------------------------------------------------------------------------------|----------------------|
| Control 1   | F   | 5:10:09 | 6                | no plasma      | N/A             | N/A                           | D11    | 44470 received clinical analgesics and antibiotics for trauma and nutritional supplements due to lean BCS                            |                      |
| Control 2   | F   | 4:10:07 | 7.01             | no plasma      | N/A             | N/A                           | D11    |                                                                                                                                      | Sneezed during study |
| CP1         | M   | 5:10:14 | 8.43             | Convul. Plasma | 27ml            | 33.7                          | D12    | Dexamethasone suppression/ACTH stimulation tests as part of BBA testing (2014) Experimental vaccine (for Campylobacter coli in 2018) |                      |
| NP1         | M   | 5:10:26 | 8.95             | normal plasma  | 27ml            | 35.8                          | D12    | 44309 has historically received clinical analgesics, antibiotics, and supplements for trauma cases                                   |                      |
| NP2         | M   | 5:09:18 | 9.74             | normal plasma  | 30ml            | 39.0                          | D13    |                                                                                                                                      |                      |
| CP2         | M   | 5:10:19 | 8.83             | Convul. Plasma | 27ml            | 35.3                          | D13    | 44379 has received analgesics/antibiotics for trauma and antibiotics and probiotics for diarrhea historically                        | Sneezed during study |
| Control 3   | F   | 4:10:23 | 5.47             | no plasma      | N/A             | N/A                           | D14    | 45159 has received analgesics/antibiotics for trauma and probiotics for diarrhea                                                     |                      |
| Control 4   | M   | 4:10:00 | 10.72            | no plasma      | N/A             | N/A                           | D14    | 45359 has received analgesics/antibiotics for trauma and probiotics for diarrhea                                                     | Dermatitis           |

| Supplementary Table 3a: Spleen AIM Assay conditions |             |                                             |   |   |       |       |       |      |     |
|-----------------------------------------------------|-------------|---------------------------------------------|---|---|-------|-------|-------|------|-----|
| Spleen                                              | Animal code | N                                           | S | M | ORF1- | ORF1- | ORF3a | ORF8 | P/I |
|                                                     |             |                                             |   |   | nsp3  | nsp4  |       |      |     |
| 1                                                   | Control 1   | Excluded due to low CD3 events              | ✓ | ✓ | ✓     | ✓     | ✓     | ✓    | ✓   |
| 2                                                   | Control 2   | ✓                                           | ✓ | ✓ | ✓     | ✓     | ✓     | ✓    | ✓   |
| 3                                                   | CP1         | ✓                                           | ✓ | ✓ | ✓     | ✓     | ✓     | ✓    | ✓   |
| 4                                                   | NP1         | ✓                                           | ✓ | ✓ | ✓     | ✓     | ✓     | ✓    | ✓   |
| 5                                                   | NP2         | Excluded due to low recovery of CD95+ cells |   |   |       |       |       |      |     |
| 6                                                   | CP2         |                                             |   |   |       |       |       |      |     |
| 7                                                   | Control 3   | ✓                                           | ✓ | ✓ | ✓     | ✓     | ✓     | ✓    | ✓   |
| 8                                                   | Control 4   | ✓                                           | ✓ | ✓ | ✓     | ✓     | ✓     | ✓    | ✓   |

| Supplementary Table 3b: Mediastinal LN AIM Assay conditions |             |                                             |
|-------------------------------------------------------------|-------------|---------------------------------------------|
| Med LN                                                      | Animal code | N S                                         |
| 1                                                           | Control 1   | Excluded due to low recovery of CD95+ cells |
| 2                                                           | Control 2   |                                             |
| 3                                                           | CP1         | ✓                                           |
| 4                                                           | NP1         | ✓                                           |
| 5                                                           | NP2         | Excluded due to low recovery of CD95+ cells |
| 6                                                           | CP2         |                                             |
| 7                                                           | Control 3   | ✓                                           |
| 8                                                           | Control 4   | ✓                                           |

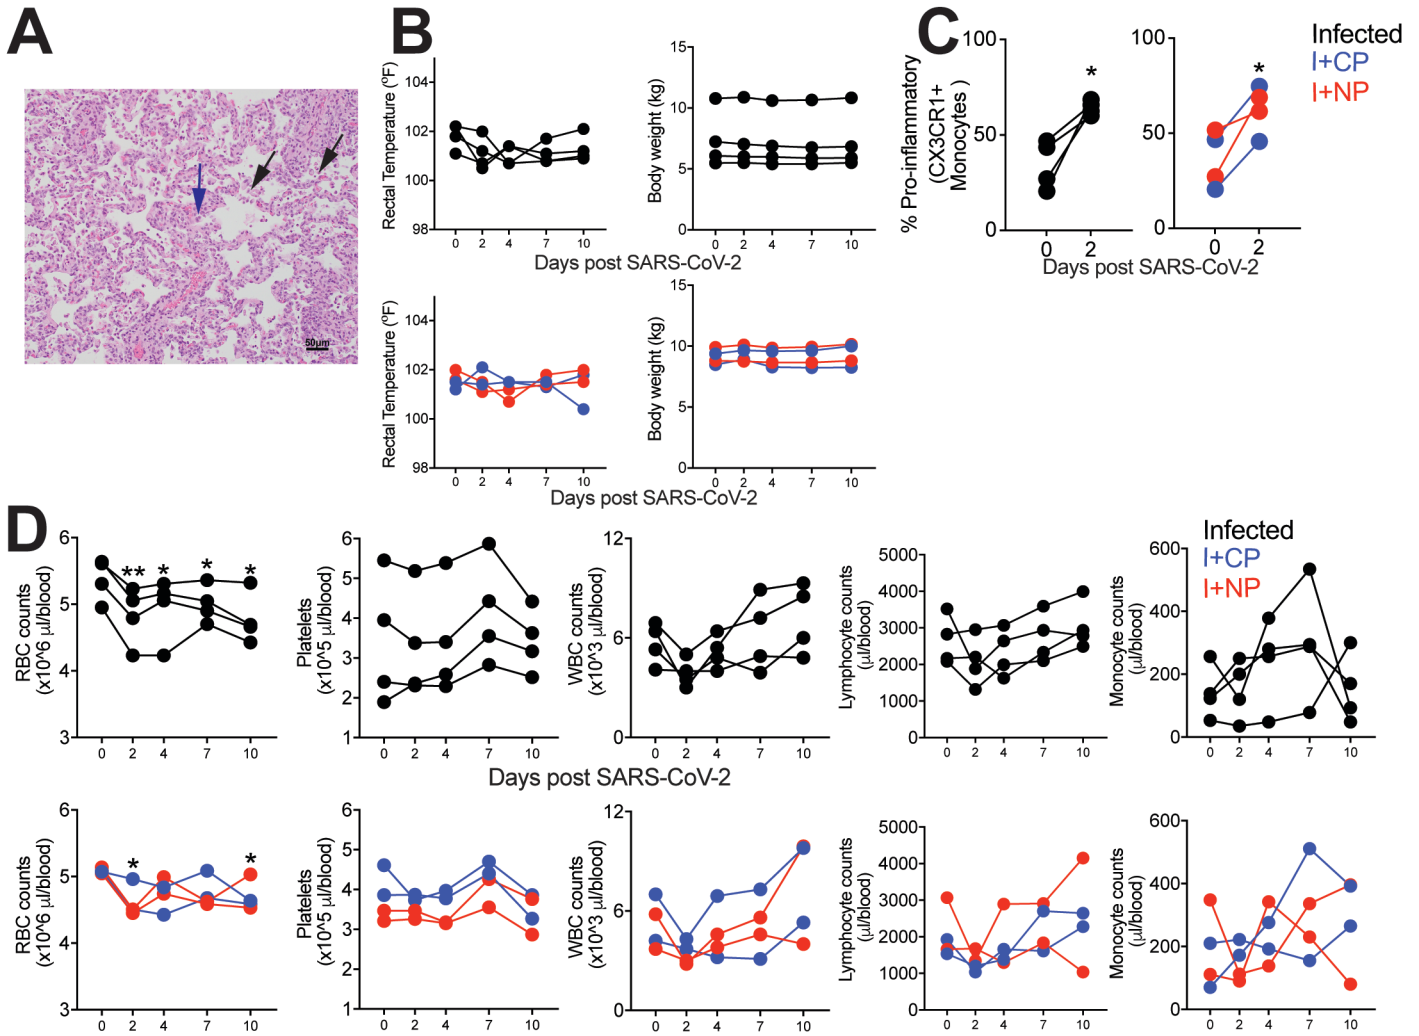

**Supplemental Figure 1.** Clinical symptoms and complete blood counts following SARS-CoV-2 infection (A) Alveolar septae are expanded by a mixed inflammatory cell infiltrate and alveoli contain macrophages [black arrow] and occasional neutrophils; interstitial thickening is also apparent [blue arrow]. H&E staining was performed in independent batches for all 8 animals and evaluated independently by two pathologists. Micrograph representative of animals in cohort (n=8). (B) Rectal Temperature [ $^{\circ}$ F] and Body weight [kg] of SARS-CoV-2 infected rhesus macaques over the course of the study. (C) Frequency of pro-inflammatory monocytes [CD14+CD16+] expressing CX3CR1 at day 0 and 2 within blood following infection ( $p = 0.02$  one-tailed paired t test for both infected and infected + infused animals). (D) RBC Counts [ $\times 10^6$  /ul] (\*\*,  $p = 0.004$ ; \*  $p = 0.01$  at indicated time points relative to d0 using a one-tailed paired t test). Platelets [ $\times 10^5$  /ul blood], WBC counts [ $\times 10^3$  /ul blood], Lymphocyte counts [/ul blood] and Monocyte counts [/ul blood] over the course of the study; Infected (black circles) are RM that were infected and received no plasma treatment, I+CP (blue circles) are RM that were infected and received normal plasma from patients with no history of SARS-CoV-2 infection.

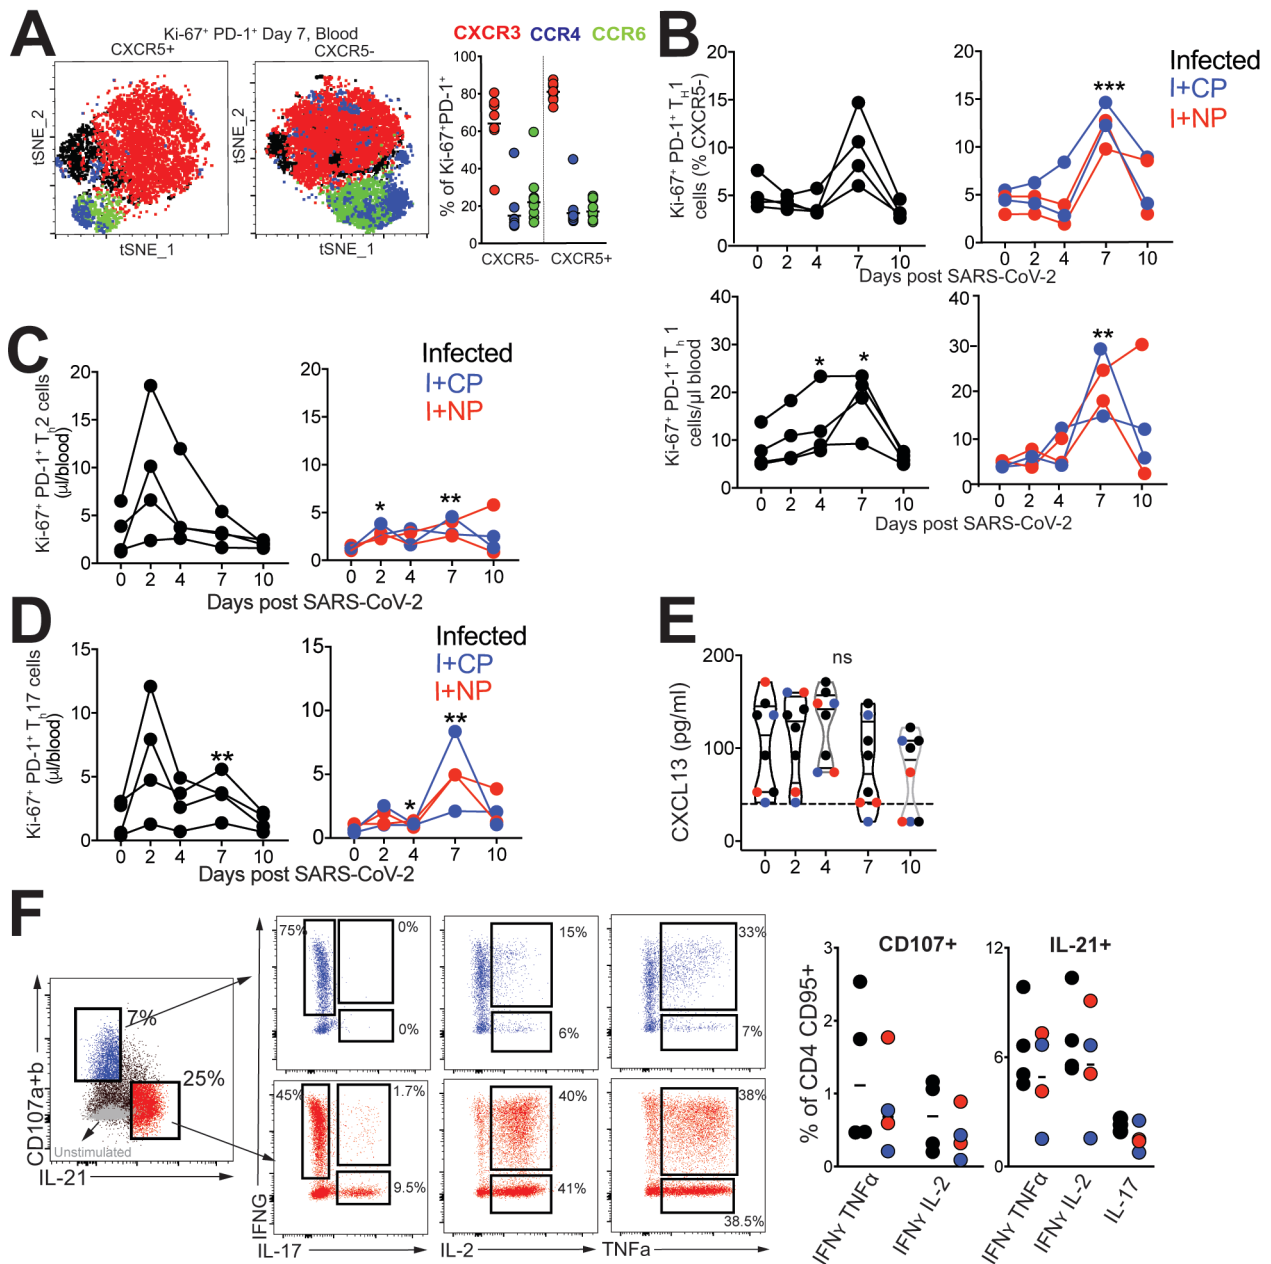

**Supplemental Figure 2.** SARS-CoV-2 infection elicits Ki67+PD-1+ Th1 cells at Day 7 that are polyfunctional (A) tSNE plots of CD4+Ki67+PD-1+ CXCR5+/CXCR5- populations constructed from flow cytometry data show representation of Th1 effectors [CXCR3+], Th2 effectors [CCR4+], and Th17 effectors [CCR6+]. (B) Increase of Ki67+PD-1+ Th1 cells in both cell frequency and cells/ $\mu$ l blood at day 7 post infection. (C) Kinetics of Ki-67+ PD-1+ Th2 cells [/ $\mu$ l blood] (D) Kinetics of Ki-67+ PD-1+ Th17 cells [/ $\mu$ l blood]. (B-D, \*\*\*p = 0.001, \*\*p = 0.0013, \*p = 0.0153 at indicated time points relative to d0 using a one-tailed paired t test). (E) Serum CXCL13 following infection (ns using a one-tailed paired t test). Data points represent cytokine production from n = 8 animals. (F) Representative expression of IFN $\gamma$ , IL-17, IL-2, TNF- $\alpha$  within two CD4 populations: CD107a/b+ cells and IL-21+ cells after stimulation. Grey scatter plot in E shows overlay of cytokine production in unstimulated cells (unstim). Data points represent cytokine production from n = 8 animals.

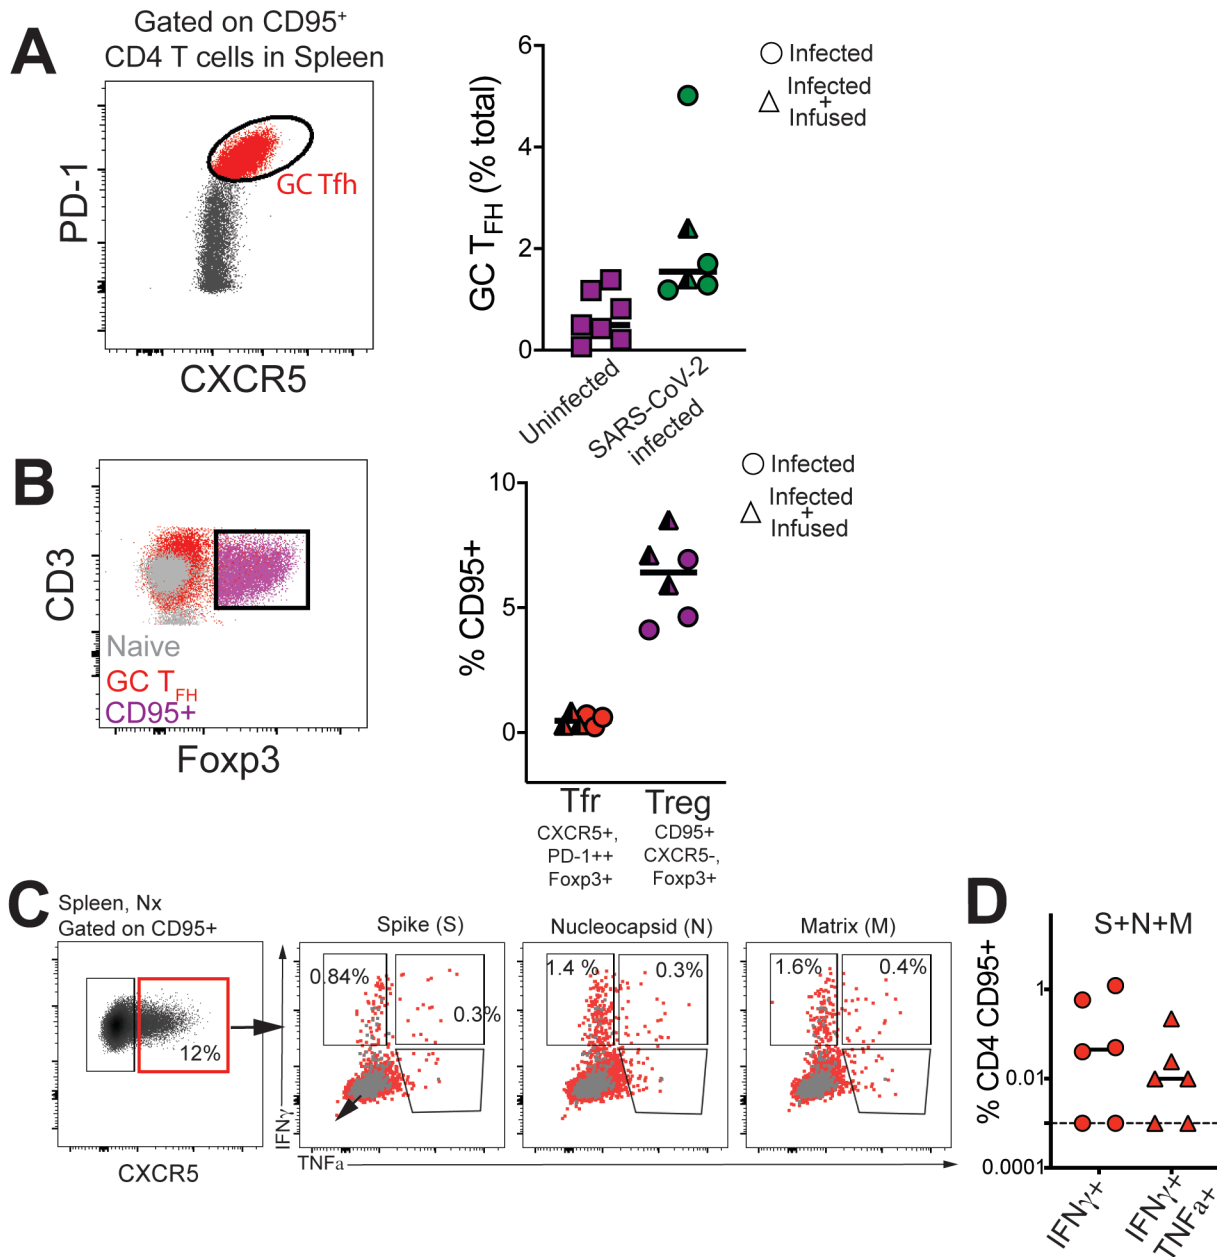

**Supplemental Figure 3.** Splenic GC TFH, Tfr, and Treg populations during SARS-CoV-2 infection (**A**) Flow plot of splenic GC TFH cells [CXCR5+PD-1<sup>hi</sup>] at necropsy (d11-d14pi) and dot plot graph designating an increase of GC TFH in SARS-CoV-2 infected rhesus macaques (n = 7 unexposed, n = 5 animals from SARS-CoV-2 infected animals). (**B**) Flow Plot of Treg [CD95<sup>+</sup>, CXCR5<sup>-</sup>, Foxp3<sup>+</sup>] and Tfr [CXCR5<sup>+</sup>, PD-1<sup>++</sup>, Foxp3<sup>+</sup>] cells. n = 5 animals from SARS-CoV-2 infected animals Controls (circles) are RM that were infected and received no plasma treatment, Infused (triangles) are RM that were infected and received either convalescent plasma or normal plasma. (**C**) Flow plot illustrating gating strategy to identify cytokine producing cells in spleen following stimulation with S, N, and M. Cytokine responses in unstimulated cells shown in gray. (**D**) Scatter plot shows frequency of cytokine+ CD4 T cells for n = 6 animals.



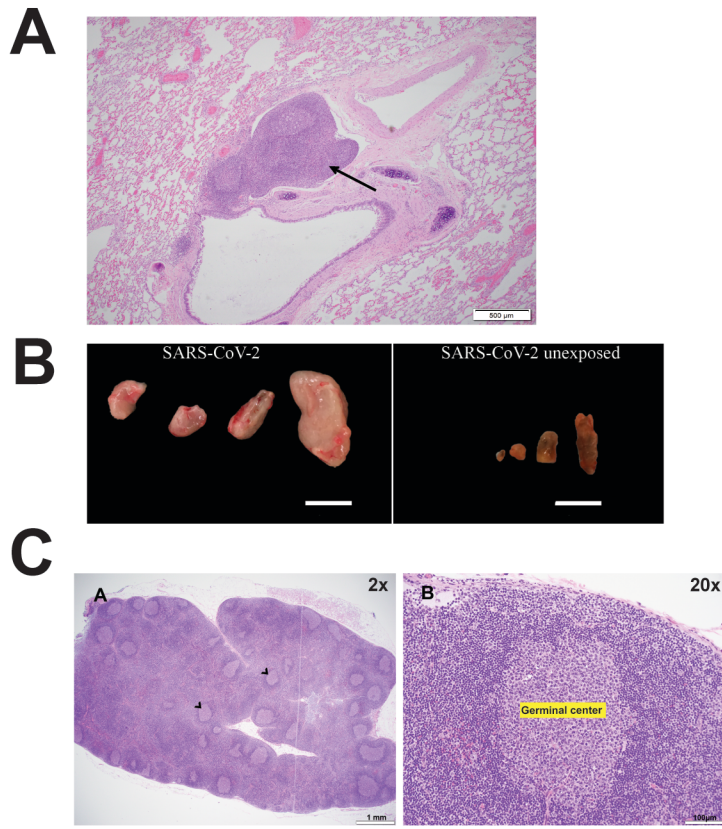

**Supplemental Figure 4.** SARS-CoV-2 infection increases mediastinal lymph node size and elicits germinal centers. (A) Large aggregate of bronchial associated lymphoid tissue [arrow] adjacent to a moderately large airway and associated blood vessel. Two well defined germinal centers can be seen within the BALT. H&E staining was performed in independent batches for all 8 animals and evaluated independently by two pathologists. Micrograph representative of animals in cohort (n=8). (B) Comparison of SARS-CoV-2 uninfected [left] and SARS-CoV-2 infected [right] mediastinal lymph nodes show distinct lymphadenopathy. (C) Representative H&E-stained mediastinal lymph node section showing distinct abundance of pale germinal centers (arrow). H&E staining was performed in a single batch and evaluated by a single technician. Image representative of GC within Mediastinal LN in all 8 animals.

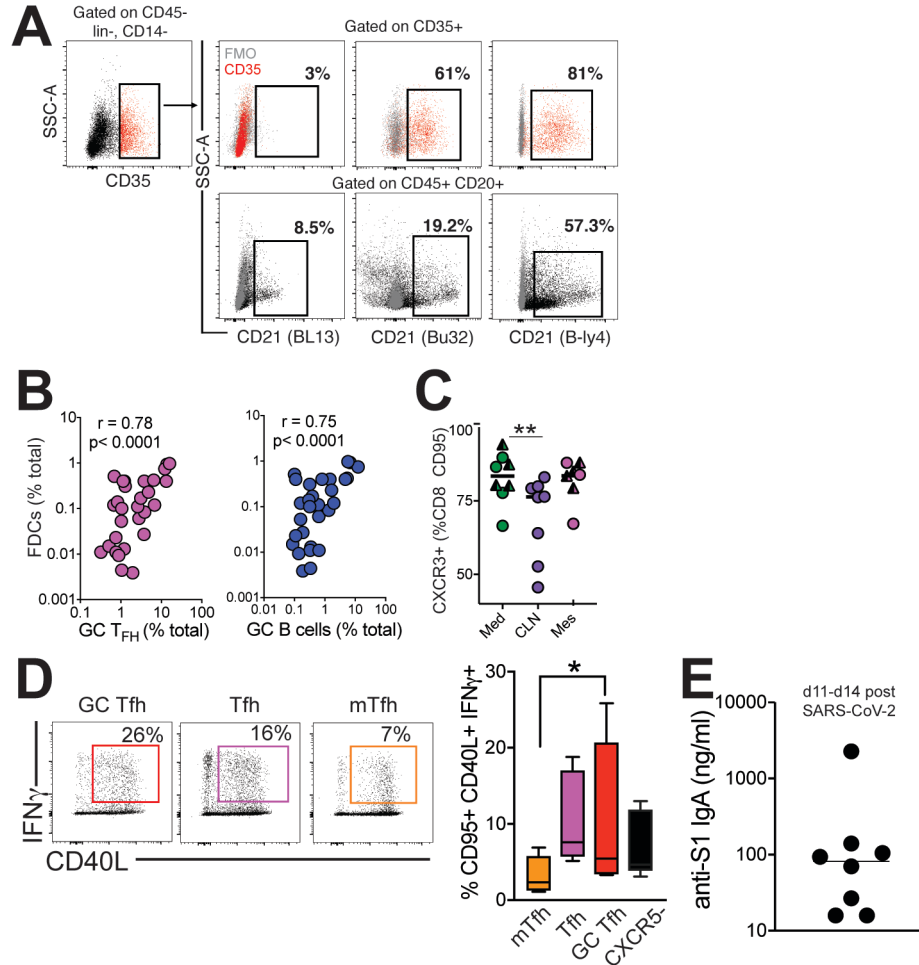

**Supplemental Figure 5. SARS-CoV-2 infection elicits GC responses (A)** Detection of follicular dendritic cells (FDCs) gating on CD45-Lin-CD14-CD35+CD21+ using flow cytometry; three different clones are used for comparison [BL13, BU32, B-LY4]. **(B)** Correlations between % total FDCs and % total GC TFH or % total GC B cells. Two-tailed Pearson test p values shown for 29 samples across lymph nodes from  $n = 8$  animals. **(C)** Increased frequencies of CXCR3<sup>+</sup> CD8 T cells in mediastinal lymph node (Med,  $n = 8$ ; CLN,  $n = 8$ ; Mes,  $n = 7$ ). **(D)** Functional characterization of mediastinal lymph node following SARS-CoV-2 infection in response to PMA/Ionomycin stimulation shows enrichment of CD40L<sup>+</sup> IFN $\gamma$ <sup>+</sup> cells within GC Tfh cells (\*  $p < 0.05$  relative to memory Tfh cells). Box-whiskers plot shows range of data, bounds of the box extend from the 25th to 75th percentile, line in box is plotted at the median. **(E)** IgA at necropsy
