# Supplementary material for: SARS-CoV-2 induces robust germinal center CD4 T follicular helper cell responses in rhesus macaques
Source: PubMed Central journal article supplement (PMC7822826; doi:10.1038/s41467-020-20642-x), 2021-01-22
Supplement: 41467_2020_20642_MOESM3_ESM.pdf [file 41467_2020_20642_MOESM3_ESM.pdf]

## Reporting Summary

Nature Research wishes to improve the reproducibility of the work that we publish. This form provides structure for consistency and transparency in reporting. For further information on Nature Research policies, see our [Editorial Policies](#) and the [Editorial Policy Checklist](#).

### Statistics

For all statistical analyses, confirm that the following items are present in the figure legend, table legend, main text, or Methods section.

n/a Confirmed

- The exact sample size ( $n$ ) for each experimental group/condition, given as a discrete number and unit of measurement
- A statement on whether measurements were taken from distinct samples or whether the same sample was measured repeatedly
- The statistical test(s) used AND whether they are one- or two-sided  
*Only common tests should be described solely by name; describe more complex techniques in the Methods section.*
- A description of all covariates tested
- A description of any assumptions or corrections, such as tests of normality and adjustment for multiple comparisons
- A full description of the statistical parameters including central tendency (e.g. means) or other basic estimates (e.g. regression coefficient) AND variation (e.g. standard deviation) or associated estimates of uncertainty (e.g. confidence intervals)
- For null hypothesis testing, the test statistic (e.g.  $F$ ,  $t$ ,  $r$ ) with confidence intervals, effect sizes, degrees of freedom and  $P$  value noted  
*Give  $P$  values as exact values whenever suitable.*
- For Bayesian analysis, information on the choice of priors and Markov chain Monte Carlo settings
- For hierarchical and complex designs, identification of the appropriate level for tests and full reporting of outcomes
- Estimates of effect sizes (e.g. Cohen's  $d$ , Pearson's  $r$ ), indicating how they were calculated

*Our web collection on [statistics for biologists](#) contains articles on many of the points above.*

### Software and code

Policy information about [availability of computer code](#)

Data collection

**1) Data Collection : Flow cytometry: FACSymphony (BD) with FACSDiva software version 8.0; ELISA: Bioplex 200 (BioRad); Serum cytokine: Luminex® 200 dual laser instrument (Luminex, Austin, TX); qPCR: QuantStudio 12K Flex Real-Time PCR System (Applied Biosystem)**

Data analysis

**2) Data analysis : Flow cytometry: FlowJo software version 10.; ELISA : BioManager software Serum cytokines analysis : xPONENT® software , Prism v9: software was used.**

For manuscripts utilizing custom algorithms or software that are central to the research but not yet described in published literature, software must be made available to editors and reviewers. We strongly encourage code deposition in a community repository (e.g. GitHub). See the Nature Research [guidelines for submitting code & software](#) for further information.

### Data

Policy information about [availability of data](#)

All manuscripts must include a [data availability statement](#). This statement should provide the following information, where applicable:

- Accession codes, unique identifiers, or web links for publicly available datasets
- A list of figures that have associated raw data
- A description of any restrictions on data availability

The data sets generated during and or analyses during the current study are available from the corresponding author on reasonable request.

## Field-specific reporting

Please select the one below that is the best fit for your research. If you are not sure, read the appropriate sections before making your selection.

- Life sciences       Behavioural & social sciences       Ecological, evolutionary & environmental sciences

For a reference copy of the document with all sections, see [nature.com/documents/nr-reporting-summary-flat.pdf](https://www.nature.com/documents/nr-reporting-summary-flat.pdf)

## Life sciences study design

All studies must disclose on these points even when the disclosure is negative.

- Sample size  We arrived at a sample size of 8 to capture acute and adaptive T cell responses based on the literature.
- Data exclusions No data were excluded from the analysis
- Replication  We have subsequently capture immune kinetics and Tfh responses in independent SARS-CoV-2 studies and have observed similar kinetics in rhesus presenting in mild disease.
- Randomization Animals were randomized into experimental groups.
- Blinding The pathologists were blinded to the study design for the purpose of generating unbiased histopathological analyses.

## Reporting for specific materials, systems and methods

We require information from authors about some types of materials, experimental systems and methods used in many studies. Here, indicate whether each material, system or method listed is relevant to your study. If you are not sure if a list item applies to your research, read the appropriate section before selecting a response.

### Materials & experimental systems

- | n/a                                 | Involved in the study                                           |
|-------------------------------------|-----------------------------------------------------------------|
| <input type="checkbox"/>            | <input checked="" type="checkbox"/> Antibodies                  |
| <input checked="" type="checkbox"/> | <input type="checkbox"/> Eukaryotic cell lines                  |
| <input checked="" type="checkbox"/> | <input type="checkbox"/> Palaeontology and archaeology          |
| <input type="checkbox"/>            | <input checked="" type="checkbox"/> Animals and other organisms |
| <input checked="" type="checkbox"/> | <input type="checkbox"/> Human research participants            |
| <input checked="" type="checkbox"/> | <input type="checkbox"/> Clinical data                          |
| <input checked="" type="checkbox"/> | <input type="checkbox"/> Dual use research of concern           |

### Methods

- | n/a                                 | Involved in the study                              |
|-------------------------------------|----------------------------------------------------|
| <input checked="" type="checkbox"/> | <input type="checkbox"/> ChIP-seq                  |
| <input type="checkbox"/>            | <input checked="" type="checkbox"/> Flow cytometry |
| <input checked="" type="checkbox"/> | <input type="checkbox"/> MRI-based neuroimaging    |

## Antibodies

- Antibodies used  CD3-AF 700 SP34-2 BD Biosciences 557917; CD3-APC-Cy7 SP34-2 BD Biosciences 557757; CD4-BV 650 L200 BD Biosciences 563737  
 CD8-BV 510 SK-1 BD Biosciences 563919  
 CD20-APC-Cy7 2H7 BioLegend 302314  
 CD20-BV 421 2H7 BioLegend 302328  
 CD95-BUV 737 DX2 BD Biosciences 564710  
 CD279(PD-1)-Pe-Cy7 EH12.2H8 BioLegend 329918  
 CX3CR1- PE-CF594 2A9-1 BioLegend 341624  
 CXCR3-BV 786 IC6 BD Biosciences 741005  
 CXCR5-PE MUSUBEE Thermofischer 12-9185-411G1  
 CCR4-BV 605 1G1 BD Biosciences 562906  
 CCR6-PE-CF594/A610 G034E3 BioLegend 353430  
 CCR7-BV 650 3D12 BD Biosciences 563407  
 HLA-DR-BV 786 L243 BioLegend 307642  
 CD69-BV 711 FN50 BioLegend 310944  
 CD69-Pe-Cy7 FN50 Invitrogen 25-0699-42  
 CD14-AF 700 MSE2 BD Biosciences 301822  
 CD16-BV 605 3G8 BD Biosciences 563172  
 CD11b-BV 510 ICRF44 Thermofisher 563088  
 CD11c-Pe-Cy7 3.9 Invitrogen 25-0116-42  
 CD103-APC 2G5 Beckman Coulter B06204  
 CD66-APC TET2 Miltenyi 130-118-539  
 CD163-PE GHI/61 BioLegend 333606

CD123-BV 421 7G3 ThermoFisher 501129764  
 Granzyme B-BV 421 GB11 BioLegend 515408  
 CD80-AF 488 2D10.4 Invitrogen 11-0809-42  
 CD86-AF 488 IT2.2 BioLegend 305414  
 Ki-67-AF 488 B56 BD Biosciences 558616  
 Ki-67-BV 510 B56 BD Biosciences 563462  
 CD28-Pe-Cy7 CD28.2 Tonbo 40-0289-U500  
 a4b7-PE Act-1 NHP Reag Res PR-1422  
 CD45-AF 488 D058-1283 BD Biosciences 557803  
 CD45-BV 605 D058-1283 BD Biosciences 564098  
 CD140b-APC 18A2 BioLegend 323608  
 Bcl-6-APC-Cy7 K112-91 BD Biosciences 563581  
 CD21- PE-CF594 B-ly4 BD Biosciences 563474  
 SLAM-AF 488 A12(7D4) BioLegend 306312  
 Foxp3-APC 206D BioLegend 320114  
 CD278 (ICOS)-BV 785 C396.4A BioLegend 313534  
 CD25-APC BC96 Tonbo 20-0259-T100  
 CD 134 (OX40)-BV 786 L106 BD Biosciences 744746  
 4-1BB-AF 488 4B4-1 BD Biosciences 11-1379-42  
 TNFa-AF 488 Mab11 BioLegend 502906  
 IL-21-APC 3A3-N2.1 BD Biosciences 560493  
 IFNG-PeCy7 B27 BioLegend 506518  
 IL2- PE-CF594 MO1-17H12 BioLegend 500344  
 CD107a-PE H4A3 BioLegend 328608  
 CD107b-PE EbioH4B4 ThermoFischer 12-1078-42  
 IL-17-BV 421 eBio64DEC17 eBiosciences 48-7179-42  
 CD45 RO- PE-CF594 UCHL-1 BD Biosciences 562299  
 CD28-Purified Ab CD28.2 BD Biosciences 555725  
 CD49d-Purified Ab 9F10 BD Biosciences 555501  
 Live/dead-APC-Cy7 Life technologies L34976  
 Live/dead-BV 510 Life technologies L34966  
 Bcl-6 LN22 Biocare Medical CM410A  
 CD3 CD3-12 Abcam Ab11089  
 PD-1 Polyclonal Novus NBP1-88104

Validation

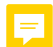

All antibodies were validated by the manufacturer. In addition, our experiments included negative and positive controls.

## Palaeontology and Archaeology

Specimen provenance

*Provide provenance information for specimens and describe permits that were obtained for the work (including the name of the issuing authority, the date of issue, and any identifying information).*

Specimen deposition

*Indicate where the specimens have been deposited to permit free access by other researchers.*

Dating methods

*If new dates are provided, describe how they were obtained (e.g. collection, storage, sample pretreatment and measurement), where they were obtained (i.e. lab name), the calibration program and the protocol for quality assurance OR state that no new dates are provided.*

Tick this box to confirm that the raw and calibrated dates are available in the paper or in Supplementary Information.

Ethics oversight

*Identify the organization(s) that approved or provided guidance on the study protocol, OR state that no ethical approval or guidance was required and explain why not.*

Note that full information on the approval of the study protocol must also be provided in the manuscript.

## Animals and other organisms

Policy information about [studies involving animals](#); [ARRIVE guidelines](#) recommended for reporting animal research

Laboratory animals

Macaca mulatta, Males (n=5); Females (n=3); age 4 -5 years

Wild animals

The study did not involve wild animals

Field-collected samples

The study did not involve samples collected from the field

Ethics oversight

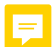

University of California at Davis

Note that full information on the approval of the study protocol must also be provided in the manuscript.

## Human research participants

Policy information about [studies involving human research participants](#)

### Population characteristics

Describe the covariate-relevant population characteristics of the human research participants (e.g. age, gender, genotypic information, past and current diagnosis and treatment categories). If you filled out the behavioural & social sciences study design questions and have nothing to add here, write "See above."

### Recruitment

Describe how participants were recruited. Outline any potential self-selection bias or other biases that may be present and how these are likely to impact results.

### Ethics oversight

Identify the organization(s) that approved the study protocol.

Note that full information on the approval of the study protocol must also be provided in the manuscript.

## Clinical data

Policy information about [clinical studies](#)

All manuscripts should comply with the ICMJE [guidelines for publication of clinical research](#) and a completed [CONSORT checklist](#) must be included with all submissions.

### Clinical trial registration

Provide the trial registration number from [ClinicalTrials.gov](#) or an equivalent agency.

### Study protocol

Note where the full trial protocol can be accessed OR if not available, explain why.

### Data collection

Describe the settings and locales of data collection, noting the time periods of recruitment and data collection.

### Outcomes

Describe how you pre-defined primary and secondary outcome measures and how you assessed these measures.

## Dual use research of concern

Policy information about [dual use research of concern](#)

### Hazards

Could the accidental, deliberate or reckless misuse of agents or technologies generated in the work, or the application of information presented in the manuscript, pose a threat to:

- | No                                  | Yes                      |                            |
|-------------------------------------|--------------------------|----------------------------|
| <input checked="" type="checkbox"/> | <input type="checkbox"/> | Public health              |
| <input checked="" type="checkbox"/> | <input type="checkbox"/> | National security          |
| <input checked="" type="checkbox"/> | <input type="checkbox"/> | Crops and/or livestock     |
| <input checked="" type="checkbox"/> | <input type="checkbox"/> | Ecosystems                 |
| <input checked="" type="checkbox"/> | <input type="checkbox"/> | Any other significant area |

### Experiments of concern

Does the work involve any of these experiments of concern:

- | No                                  | Yes                      |                                                                             |
|-------------------------------------|--------------------------|-----------------------------------------------------------------------------|
| <input checked="" type="checkbox"/> | <input type="checkbox"/> | Demonstrate how to render a vaccine ineffective                             |
| <input checked="" type="checkbox"/> | <input type="checkbox"/> | Confer resistance to therapeutically useful antibiotics or antiviral agents |
| <input checked="" type="checkbox"/> | <input type="checkbox"/> | Enhance the virulence of a pathogen or render a nonpathogen virulent        |
| <input checked="" type="checkbox"/> | <input type="checkbox"/> | Increase transmissibility of a pathogen                                     |
| <input checked="" type="checkbox"/> | <input type="checkbox"/> | Alter the host range of a pathogen                                          |
| <input checked="" type="checkbox"/> | <input type="checkbox"/> | Enable evasion of diagnostic/detection modalities                           |
| <input checked="" type="checkbox"/> | <input type="checkbox"/> | Enable the weaponization of a biological agent or toxin                     |
| <input checked="" type="checkbox"/> | <input type="checkbox"/> | Any other potentially harmful combination of experiments and agents         |

## ChIP-seq

### Data deposition

- Confirm that both raw and final processed data have been deposited in a public database such as [GEO](#).
- Confirm that you have deposited or provided access to graph files (e.g. BED files) for the called peaks.

Data access links  
May remain private before publication.

For "Initial submission" or "Revised version" documents, provide reviewer access links. For your "Final submission" document, provide a link to the deposited data.

Files in database submission

Provide a list of all files available in the database submission.

Genome browser session  
(e.g. [UCSC](#))

Provide a link to an anonymized genome browser session for "Initial submission" and "Revised version" documents only, to enable peer review. Write "no longer applicable" for "Final submission" documents.

## Methodology

Replicates

Describe the experimental replicates, specifying number, type and replicate agreement.

Sequencing depth

Describe the sequencing depth for each experiment, providing the total number of reads, uniquely mapped reads, length of reads and whether they were paired- or single-end.

Antibodies

Describe the antibodies used for the ChIP-seq experiments; as applicable, provide supplier name, catalog number, clone name, and lot number.

Peak calling parameters

Specify the command line program and parameters used for read mapping and peak calling, including the ChIP, control and index files used.

Data quality

Describe the methods used to ensure data quality in full detail, including how many peaks are at FDR 5% and above 5-fold enrichment.

Software

Describe the software used to collect and analyze the ChIP-seq data. For custom code that has been deposited into a community repository, provide accession details.

## Flow Cytometry

We have provided marker and fluorochrome used in the Figure legends

### Plots

Confirm that:

- The axis labels state the marker and fluorochrome used (e.g. CD4-FITC).
- The axis scales are clearly visible. Include numbers along axes only for bottom left plot of group (a 'group' is an analysis of identical markers).
- All plots are contour plots with outliers or pseudocolor plots.
- A numerical value for number of cells or percentage (with statistics) is provided.

## Methodology

Sample preparation

Whole blood was use fresh, Lung, spleen, and lymph node samples were digested with collagenase to isolate single cell suspensions.

Instrument

BD FACS Symphony

Software

FlowJo v10

Cell population abundance

No sorting was performed

Gating strategy

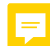

Representative gating strategies for all populations are provided in the manuscript

- Tick this box to confirm that a figure exemplifying the gating strategy is provided in the Supplementary Information.

## Magnetic resonance imaging

### Experimental design

Design type

Indicate task or resting state; event-related or block design.

Design specifications

Specify the number of blocks, trials or experimental units per session and/or subject, and specify the length of each trial or block (if trials are blocked) and interval between trials.

Behavioral performance measures

State number and/or type of variables recorded (e.g. correct button press, response time) and what statistics were used to establish that the subjects were performing the task as expected (e.g. mean, range, and/or standard deviation across subjects).

## Acquisition

Imaging type(s)

Field strength

Sequence & imaging parameters

Area of acquisition

Diffusion MRI  Used  Not used

## Preprocessing

Preprocessing software

Normalization

Normalization template

Noise and artifact removal

Volume censoring

## Statistical modeling & inference

Model type and settings

Effect(s) tested

Specify type of analysis:  Whole brain  ROI-based  Both

Statistic type for inference (See [Eklund et al. 2016](#))

Correction

## Models & analysis

|                          |                                                                       |  |
|--------------------------|-----------------------------------------------------------------------|--|
| n/a                      | Involvement in the study                                              |  |
| <input type="checkbox"/> | <input type="checkbox"/> Functional and/or effective connectivity     |  |
| <input type="checkbox"/> | <input type="checkbox"/> Graph analysis                               |  |
| <input type="checkbox"/> | <input type="checkbox"/> Multivariate modeling or predictive analysis |  |

Functional and/or effective connectivity

Graph analysis

Multivariate modeling and predictive analysis
